# Supplementary material for: Modulating Substrate Specificity of Rhizobium sp. Histamine Dehydrogenase through Protein Engineering for Food Quality Applications
Source: MDPI journal article supplement (doi:10.3390/molecules28093748), 2023-04-26
Supplement: s1 [file s1]

## Supplementary Materials

### **Modulating substrate specificity of *Rhizobium* sp. Histamine Dehydrogenase through protein engineering for food quality applications.**

Karen Rodríguez-Núñez<sup>1</sup>, Alejandra Cortés-Monroy<sup>1</sup>, Marcela Serey<sup>1</sup>, Yunus Ensari<sup>2</sup>, Mehdi D. Davari<sup>3</sup>, Claudia Bernal<sup>4</sup>, and Ronny Martinez<sup>1\*</sup>

<sup>1</sup> Departamento de Ingeniería en Alimentos, Universidad de La Serena, Av. Raúl Bitrán 1305, 1720010 La Serena, Chile.

<sup>2</sup> Department of Bioengineering, Faculty of Engineering and Architecture, Kafkas University, Kars, Turkey.

<sup>3</sup> Department of Bioorganic Chemistry, Leibniz Institute of Plant Biochemistry, Weinberg 3, D-06120, Halle, Germany.

<sup>4</sup> Instituto de Investigación Multidisciplinaria en Ciencia y Tecnología, Universidad de La Serena, Av. Raúl Bitrán 1305, 1720010 La Serena, Chile.

#### **\*Correspondence to:**

Dr. Ronny Martínez

Departamento de Ingeniería en Alimentos, Universidad de La Serena, Av. Raúl Bitrán 1305, 1720010 La Serena, Chile

Tel.: +56 51 2334661

Fax: +56 51 2204446

**E-mail:** remartinez@userena.cl

## Table of contents

| <b>Figure/Table</b>                                                                                                 | <b>Page</b>  |
|---------------------------------------------------------------------------------------------------------------------|--------------|
| <b>Figure S1: Catalytically important distance criteria based on the proposed catalytic mechanism of HDH</b>        | <b>S3</b>    |
| <b>Table S1: Substrates along with their docking binding energy towards Rsp HDH WT and F72T variant in kcal/mol</b> | <b>S3</b>    |
| <b>Figure S2. Cavity analysis of HDH using the Caver Web tool 1.0</b>                                               | <b>S4</b>    |
| <b>Table S2: List of residues involved in predicted active cavity identified by the Caver Web tool 1.0</b>          | <b>S4</b>    |
| <b>Figure S3. Tunnels analysis in HDH using CaverWeb Tool</b>                                                       | <b>S5</b>    |
| <b>Table S3. Tunnels analysis in HDH using CaverWeb Tool.</b>                                                       | <b>S6</b>    |
| <b>Table S4: Site Saturation Mutagenesis PCR primers used to construct mutant Rsp HDH libraries</b>                 | <b>S6</b>    |
| <b>Table S5: Evolutionary conservation analysis of selected residues of HDH via ConSurf and UET servers</b>         | <b>S7</b>    |
| <b>Figure S4. Evolutionary conservation analysis of HDH using Consurf</b>                                           | <b>S8-S9</b> |
| <b>Figure S5. Evolutionary Trace Analysis of HDH using UETserver</b>                                                | <b>S10</b>   |
| <b>Figure S6. Proposed catalytic mechanism of HDHs</b>                                                              | <b>S11</b>   |
| <b>Figure S7: DNA sequence used in this work for E. coli recombinant production of <i>Rhizobium Sp.</i> HDHs</b>    | <b>S12</b>   |
| <b>Figure S8: Amino acid sequence used in this work for <i>Rhizobium Sp.</i> HDHs</b>                               | <b>S13</b>   |
| <b>Figure S9: SDS-PAGE analysis of purified HDH WT Rsp</b>                                                          | <b>S14</b>   |
| <b>Supporting References</b>                                                                                        | <b>S15</b>   |

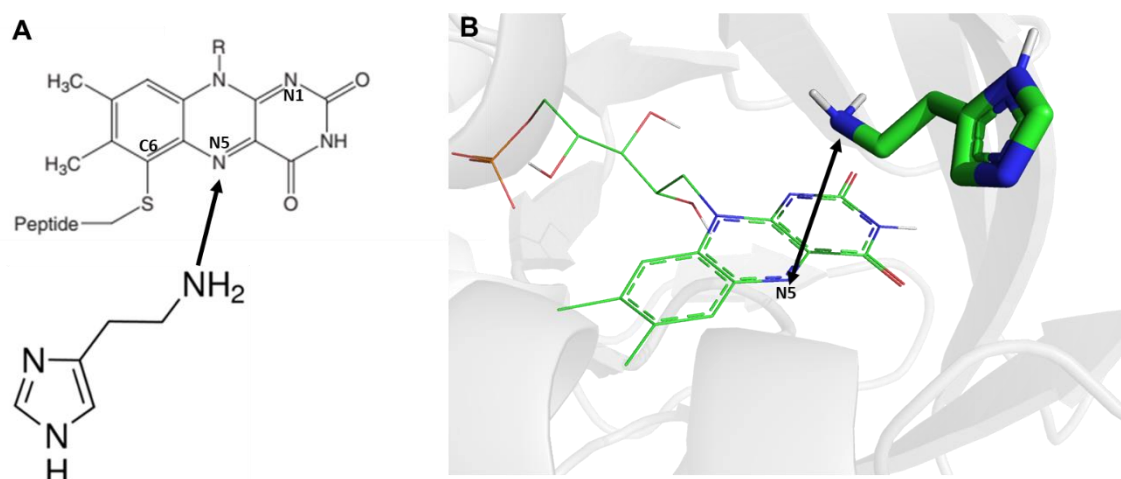

**Figure S1: Catalytically important distance criteria based on the proposed catalytic mechanism of HDH [1, 2]. A)** Schematic representation of hydride transfer from histamine to N5 atom of FAD (Figure was adapted from Tsutsumi *et al* [1] and Huang *et al.* [2]); **B)** Catalytically active pose obtained from docking of histamine to Rsp HDH. The reciprocal arrow indicates the catalytically important distance between histamine and FAD.

**Table S1: Substrates along with their docking binding energy towards *Rsp* HDH WT and F72T variant in kcal/mol.** Distance indicates the catalytically important distance (in Å) between the N5 atom of the FAD and the Nitrogen atom (hydride donor) of substrates.

| Substrate          | Variant | Distance [Å] | Binding energy [kcal/mol] |
|--------------------|---------|--------------|---------------------------|
| Histamine          | WT      | 2.655        | -4.37                     |
|                    | F72T    | 2.679        | -4.39                     |
| Agmatine           | WT      | 3.677        | - 3.42                    |
|                    | F72T    | 3.702        | -3.17                     |
| 1,3-Diaminopropane | WT      | 3.114        | -1.78                     |
|                    | F72T    | 3.571        | -1.84                     |

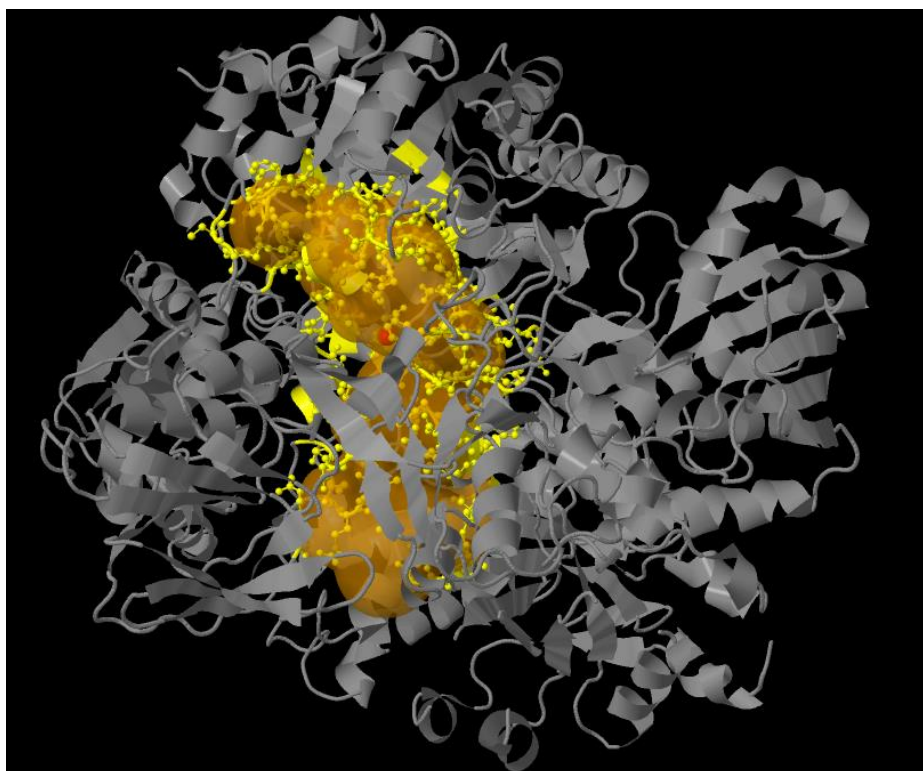

**Figure S2. Cavity analysis of HDH using the Caver Web tool 1.0 [3].** Active cavity identified in the substrate-binding domain of the HDH (PDB ID: 6DE6). The cavity with 66 lining residues, pocket relevance score; 100 % , volume 4255 Å<sup>3</sup>, druggability: 0.63. Residues constitute the cavity are shown as yellow ball and stick

**Table S2: List of residues involved in predicted active cavity identified by the Caver Web tool 1.0 [3].** Residues selected for SSM were shown as bold.

|            |             |             |             |             |      |
|------------|-------------|-------------|-------------|-------------|------|
| V27        | <b>N110</b> | G175        | <b>D265</b> | C319        | F368 |
| P28        | P112        | <b>F176</b> | C266        | A320        | R491 |
| H29        | F114        | R225        | S267        | R321        | W562 |
| C30        | I128        | D229        | G268        | P322        | R564 |
| E59        | R129        | E230        | K273        | I324        | N565 |
| <b>Q60</b> | T130        | T231        | E274        | C350        | L567 |
| <b>I69</b> | F131        | I232        | A277        | I351        |      |
| T70        | T132        | Q260        | Q278        | <b>D354</b> |      |
| P71        | N133        | G261        | V296        | M355        |      |
| <b>F72</b> | D134        | T262        | G297        | T356        |      |
| E74        | <b>Y171</b> | <b>W263</b> | R298        | M357        |      |
| Q103       | H174        | E264        | F299        | S360        |      |

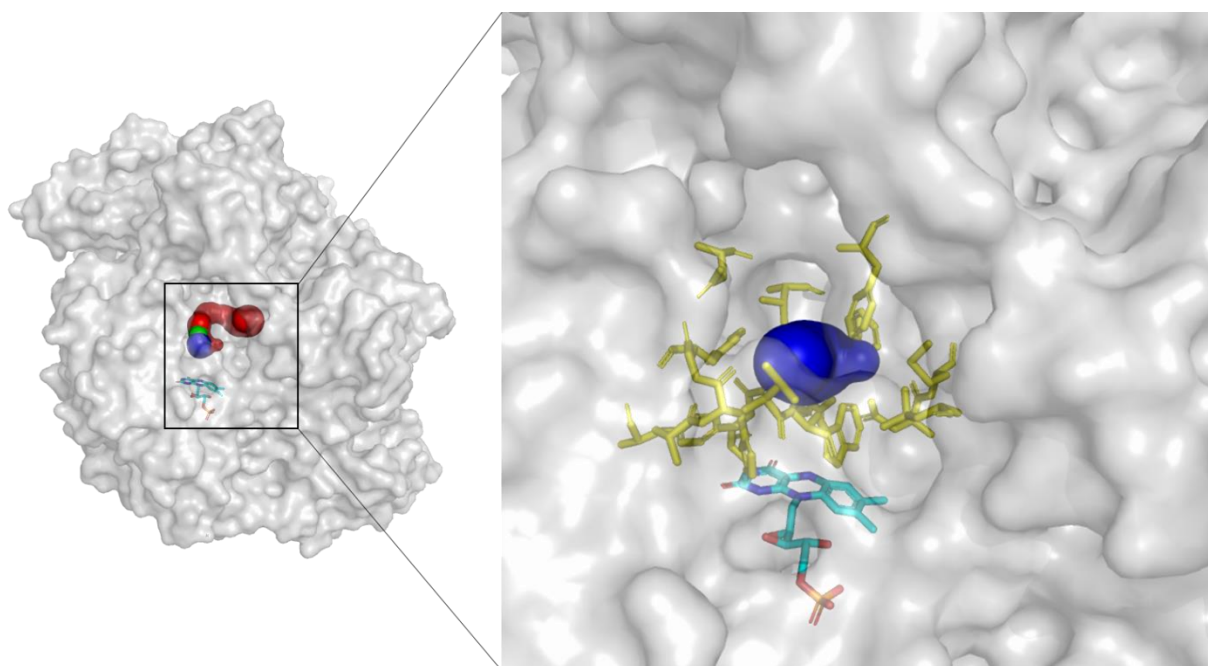

**Figure S3. Tunnels analysis in HDH using CaverWeb Tool [3].** Left; tunnel 1, tunnel 2, and tunnel 3 was shown in blue, green and blue respectively. Right; Detailed representation of the residues involved in tunnel 1 identified by CaverWeb tool. Residues were shown as yellow stick and FAD was shown as element stick. Pymol was used for visualization and hydrophobic hydrogens were removed for better visualization.

**Table S3.** Tunnels analysis in HDH using CaverWeb Tool [3]. \* color represents the tunnels shown in Figure S3

| Tunnel | Bottleneck Radius [Å] | Length [Å] | Curvature | Throughput | Color* |
|--------|-----------------------|------------|-----------|------------|--------|
| 1      | 1.3                   | 6.2        | 1.4       | 0.84       | Blue   |
| 2      | 1.3                   | 8.7        | 1.9       | 0.77       | Green  |
| 3      | 1.3                   | 24.3       | 3.2       | 0.63       | Red    |

**Table S4:** Site Saturation Mutagenesis PCR primers used to construct mutant Rsp HDH libraries. Degenerated NNK codons were used for amino acid diversity generation in the selected positions. In addition, the binding 5' and 3' sequences flanking the NNK codons were designed to have a 55°C melting temperature; thus, all primers can be run in a single PCR program. The degenerated codon for each primer is highlighted in bold letters.

| Library | Target | Primer       | Sequence                                                                 |
|---------|--------|--------------|--------------------------------------------------------------------------|
| 1       | Gln60  | Gln60sat_FW  | GTT GGG GTG TTA TCT TCA CCG AA <b>NNK</b> ACC GAA ATG CAC CAC ACC        |
|         |        | Gln60sat_RV  | GGT GTG GTG CAT TTC GGT <b>MNN</b> TTC GGT GAA GAT AAC ACC CCA AC        |
| 2       | Ile69  | Ile69sat_FW  | GAA ATG CAC CAC ACC TCT GAA <b>NNK</b> ACC CCG TTC ATC GAA CTG           |
|         |        | Ile69sat_RV  | CAG TTC GAT GAA CGG GGT <b>MNN</b> TTC AGA GGT GTG GTG CAT TTC           |
| 3       | Phe72  | Phe72sat_FW  | CAC CTC TGA AAT CAC CCC G <b>NNK</b> ATC GAA CTG CGT CTG TGG             |
|         |        | Phe72sat_RV  | CCA CAG ACG CAG TTC GAT <b>MNN</b> CGG GGT GAT TTC AGA GGT G             |
| 4       | Asn110 | Asn110sat_FW | GCT GGC GTA CTC TGG TAT C <b>NNK</b> GGT CCG AAC TTC TAC ACC AAA G       |
|         |        | Asn110sat_RV | CTT TGG TGT AGA AGT TCG GAC <b>CMN</b> <b>NGA</b> TAC CAG AGT ACG CCA GC |
| 5       | Tyr171 | Tyr171sat_FW | GTT TCG ACC TGA TCT GCC TG <b>NNK</b> GGT GCG CAC GGT TTC                |
|         |        | Tyr171sat_RV | GAA ACC GTG CGC ACC <b>MNN</b> CAG GCA GAT CAG GTC GAA AC                |
| 6       | Phe176 | Phe176sat_FW | CGG TGC GCA CGG T <b>NNK</b> GGT ATC TTC CAG CAC TTC CTG TC              |
|         |        | Phe176sat_RV | GAC AGG AAG TGC TGG AAG ATA <b>CCM</b> <b>NNA</b> CCG TGC GCA CCG        |
| 7       | Trp263 | Trp263sat_FW | GGC GCA GGG GAC C <b>NNK</b> GAA GAC TGC TCT GGT CCG TC                  |
|         |        | Trp263sat_RV | GAC GGA CCA GAG CAG TCT <b>TCM</b> <b>NNG</b> GTC CCC TGC GCC            |
| 8       | Asp265 | Asp265sat_FW | GCA GGG GAC CTG GGA A <b>NNK</b> TGC TCT GGT CCG TCT CG                  |
|         |        | Asp265sat_RV | CGA GAC GGA CCA GAG <b>CAM</b> <b>NNT</b> TCC CAG GTC CCC TGC            |
| 9       | Asp354 | Asp354sat_FW | CAA CAT CTG CAT CAC CGG T <b>NNK</b> ATG ACC ATG TCT ATC TCT CGT TGC     |
|         |        | Asp354sat_RV | GCA ACG AGA GAT AGA CAT GGT CAT <b>MNN</b> ACC GGT GAT GCA GAT GTT G     |

**Table S5: Evolutionary conservation analysis of selected residues of HDH via ConSurf [4] and UET servers [5].**

| <b>Residue</b> | <b>ConSurf</b> | <b>Evolutionary Trace Score (rvET)</b> |
|----------------|----------------|----------------------------------------|
| <b>Q60</b>     | 7              | 53.69                                  |
| <b>I69</b>     | 6              | 54.78                                  |
| <b>F72</b>     | 1              | 56.61                                  |
| <b>E74</b>     | 7              | 57.24                                  |
| <b>N110</b>    | 4              | 43.41                                  |
| <b>F131</b>    | 1              | 122.91                                 |
| <b>Y171</b>    | 9              | 20.79                                  |
| <b>A173</b>    | 6              | 27.84                                  |
| <b>H174</b>    | 9              | 20.05                                  |
| <b>G175</b>    | 3              | 21.74                                  |
| <b>F176</b>    | 7              | 12.71                                  |
| <b>T262</b>    | 3              | 122.91                                 |
| <b>W263</b>    | 9              | 122.91                                 |
| <b>D265</b>    | 6              | 59.56                                  |
| <b>D354</b>    | 9              | 48.01                                  |
| <b>M355</b>    | 3              | 47.38                                  |
| <b>L567</b>    | 6              | 61.06                                  |

## ConSurf Results

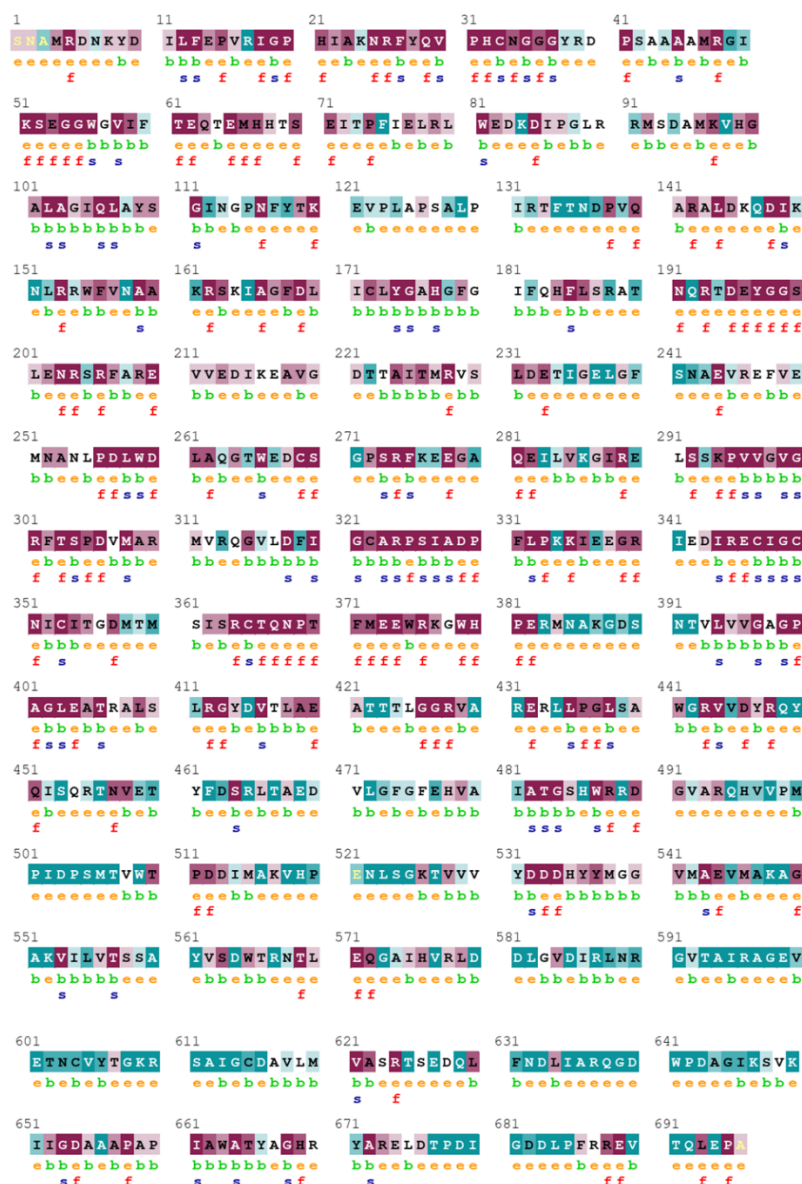

The conservation scale:

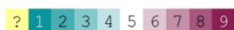

Variable      Average      Conserved

- e - An exposed residue according to the neural-network algorithm.
- b - A buried residue according to the neural-network algorithm.
- f - A predicted functional residue (highly conserved and exposed).
- s - A predicted structural residue (highly conserved and buried).
- X - Insufficient data - the calculation for this site was performed on less than 10% of the sequences.



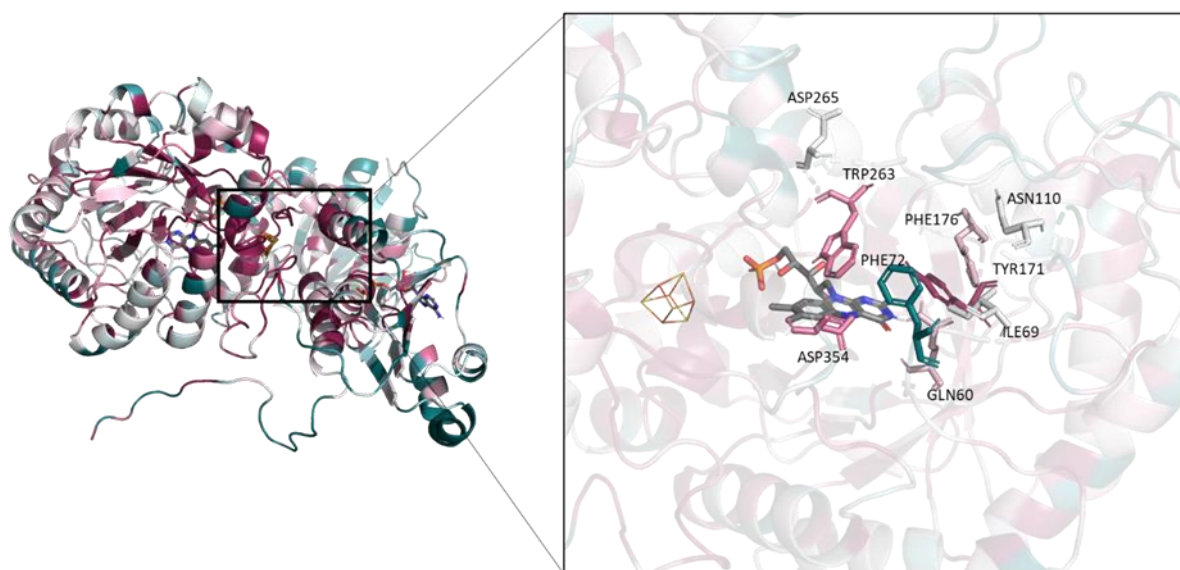

**Figure S4. Evolutionary conservation analysis of HDH using Consurf [5]. A) Sequence B) Cartoon representation of 3D structure of the *Rsp* HDH. The residues are color-coded as indicated by the conservation scale.**

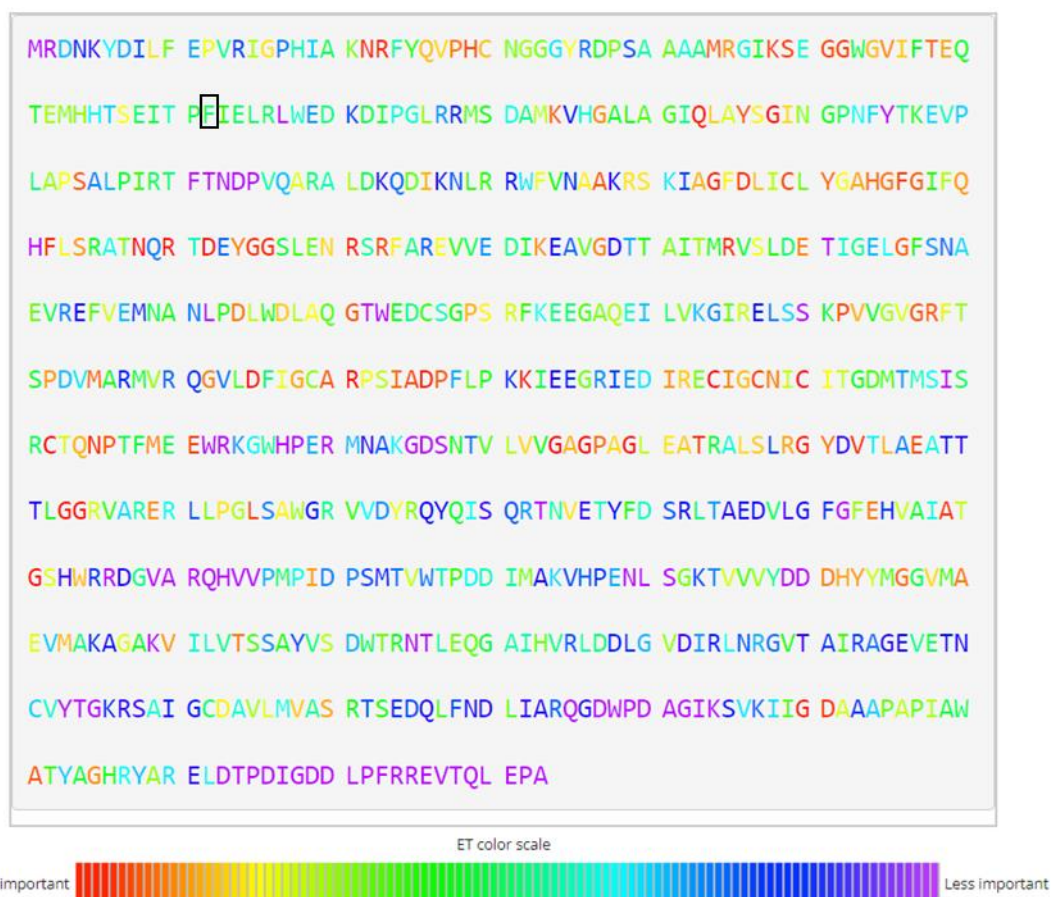

**Figure S5. Evolutionary Trace Analysis of HDH using UETserver [5]. The evolutionary importance of residues is color coded from red (more important) to violet (less important). Residue Phe72 is marked in black.**

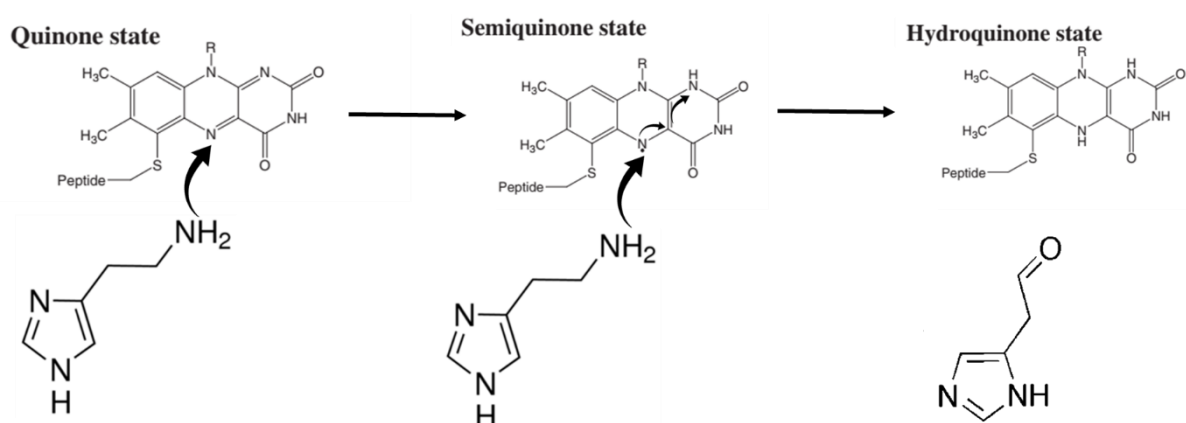

**Figure S6. Proposed catalytic mechanism of HDHs.** Flavin can undergo hydride transfer; Flavin is able to accept hydride at N5 of the flavin nucleus from NAD(P)H and several organic substances. Thus, hydrides at the amine group of histamine are transferred to N5 atom of FMN molecule. The first hydride is transferred to N5 and then is transferred to N1. Later, the second hydride is transferred to N5 and FMN turns to its hydroquinone state. Thus, the distance between amine group of histamine and N5 of FMN is important for the catalytic mechanism of HDH. Figure was adapted from Tsutsumi *et al* [1] and Huang *et al.* [2].

**ATGGGCAGCAGCCATCATCATCATCACAGCAGCGGCCTGGTGCCGCGCGGCAGCCAT**  
ATGCGTGACAACAAATACGACATCCTGTTTGAACCGGTTTCGTATCGGTCCGCACATCGCG  
AAAAACCGTTTTCTACCAGGTTCCGCACTGCAACGGTGGTGGTTACCGTGACCCGTCTGCG  
GCGGCGGCGATGCGTGATCAAAATCTGAAGGTGGTTGGGGTGTATCTTCACCGAACAG  
ACCGAAATGCACCACACCTCTGAAATCACCCCGTTCATCGAACTGCGTCTGTGGGAAGAC  
AAAGACATCCCGGGTCTGCGTCGTATGTCTGACGCGATGAAAGTTCACGGTGCGCTGGCG  
GGTATCCAGCTGGCGTACTCTGGTATCAACGGTCCGAACTTCTACACCAAAGAAGTTCCG  
CTGGCGCCGTCTGCGCTGCCGATCCGTACCTTCACCAACGACCCGGTTCAGGCGCGTGCG  
CTGGACAAACAGGACATCAAAAACCTGCGTCGTTGGTTTCGTTAACGCGGCGAAACGTTCT  
AAAATCGCGGGTTTCGACCTGATCTGCCTGTACGGTGCGCACGGTTTCGGTATCTTCCAG  
CACTTCCTGTCTCGTGCGACCAACCAGCGTACCGACGAATACGGTGGTTCTCTGGAAAAC  
CGTTCTCGTTTTCGCGCGTGAAGTTGTTGAAGACATCAAAGAAGCGGTTGGTGACACCACC  
GCGATCACCATGCGTGTTTTCTCTGGACGAAACCATCGGTGAACTGGGTTTTCTCTAACGCG  
GAAGTTCGTGAGTTTGTGAAATGAACGCGAACCTGCCGGACCTGTGGGACCTGGCGCAG  
GGGACCTGGGAAGACTGCTCTGGTCCGTCTCGTTTCAAAGAAGAAGGTGCGCAGGAAATC  
CTGGTTAAAGGTATCCGTGAACTGTCTTCTAAACCGGTTGTTGGTGTGGTCTGTTTACC  
TCTCCGGACGTTATGGCGCGTATGGTTTCGTACGGGTGTTCTGGACTTCATCGGTTGCGCG  
CGTCCGTCTATCGCGGACCCGTTTCTGCCGAAAAAATCGAAGAAGGTGATCGAAGAC  
ATCCGTGAATGCATCGGTTGCAACATCTGCATCACCGGTGACATGACCATGTCTATCTCT  
CGTTGCACCCAGAACCCGACCTTCATGGAAGAAATGGCGTAAAGGTGGCACCCGGAACGT  
ATGAACGCGAAAGGTGACTCTAACACCGTTCTGGTTGTTGGTGCGGGTCCGGCGGGTCTG  
GAAGCGACCCGTGCGCTGTCTCTGCGTGGTTACGACGTTACCCTGGCGGAAGCGACCACC  
ACCCTGGGTGGTTCGTGTTGCGCGTGAACGTCTGCTGCCGGGTCTGTCTGCGTGGGGTCTG  
GTTGTTGACTACCGTCAGTACCAGATCTCTCAGCGTACCAACGTTGAAACCTACTTCGAC  
TCTCGTCTGACCGCGGAAGACGTTCTGGGTTTCGGTTTCGAACACGTTGCGATCGCGACC  
GGTTCTCACTGGCGTCGTGACGGTGTGCGCGTCAGCACGTTGTTCCGATGCCGATCGAC  
CCGTCTATGACCGTTTGGACCCCGGACGACATCATGGCGAAAGTTCACCCGGAACCTG  
TCTGGTAAAACCGTTGTTGTTTACGACGACGACCACTACTACATGGGTGGTGTATGGCG  
GAAGTTATGGCGAAAGCGGGTGCAGAAAGTTATCCTGGTTACCTCTTCTGCGTACGTTTCT  
GACTGGACCCGTAAACACCCTGGAACAGGGTGCGATCCACGTTTCGTCTGGACGACCTGGGT  
GTTGACATCCGTCTGAACCGTGGTGTACCGCGATCCGTGCGGGTGAAGTTGAAACCAAC  
TGCGTTTACACCGGTAAACGTTCTGCGATCGGTTGCGACGCGGTTCTGATGGTTGCGTCT  
CGTACCTCTGAAGACCAGCTGTTCAACGACCTGATCGCGCGTCAGGGTGAAGTGGCCGGAC  
GCGGGTATCAAATCTGTTAAATCATCGGTGACGCGCGCGCGCCGGCGCCGATCGCGTGG  
GCGACCTACGCGGGTACCGTTACGCGCGTGAAGTGGACACCCCGGACATCGGTGACGAC  
CTGCCGTTCCGTCTGTAAGTTACCCAGCTGGAACCGCGCTAA

**Figure S7:** DNA sequence used in this work for *E. coli* recombinant production of *Rhizobium Sp.* HDH (2142 bp), the codon usage, was optimized for *E. coli* transcription/translation. The sequence in bold is coding for the N-terminal 6x Histidine tag genetically added to the enzyme.

**MGSSHHHHHSSGLVPRGSH**MRDNKYDILFEPVRIGPHIAKNRFYQVPHCNGGGYRDPSA  
 AAAMRGIKSEGGWGVIFTEQTEMHHTSEITPFIELRLWEDKDIPGLRRMSDAMKVHGALA  
 GIQLAYSGINGPNFYTKFVPLAPSALPIRTFTNDPVQARALDKQDIKNLRRWFVNAAKRS  
 KIAGFDLICLYGAHGFQIFQHFLSRATNQRTDEYGGSLNRSRFAREVVEDIKEAVGDTT  
 AITMRVSLDETIGELGFSNAEVREFVEMNANLPDLWDLAQGTWEDCSGPSRFKEEGAQEI  
 LVKGIRELSSKPVVGVGRFTSPDVMARMVRQGVLDFIGCARPSIADPFLPKKIEEGRIED  
 IRECIGCNICITGDMTMSISRCTQNPTFMEEWRKGWHPERMNAKGDSNTVLVVGAGPAGL  
 EATRALSLRGYDVTLAEATTTLGGRVARERLLPGLSAWGRVVDYRQYQISQRTNVETYFD  
 SRLTAEDVLGFGFEHVAIATGSHWRRDGVARQHVVPMPIIDPSMTVWTPDDIMAKVHPENL  
 SGKTVVYDDDHYYMGGVMAEVMKAGAKVILVTSSAYVSDWTRNTLEQGAIHVRLDDL  
 VDIRLNRGVTAIRAGEVETNCVYTGKRSAIGDAVLMVASRTSEDQLFNDLIARQGDWPD  
 AGIKSVKIIIGDAAAPAPIAWATYAGHRYARELDTPDIGDDLPRREVTQLEPA

**Figure S8:** Amino acid sequence used in this work for *Rhizobium Sp.* HDHs (713 aa), the codon usage, was optimized for *E. coli* transcription/translation. The sequence in bold is coding for the N-terminal 6x Histidine tag genetically added to the enzyme.

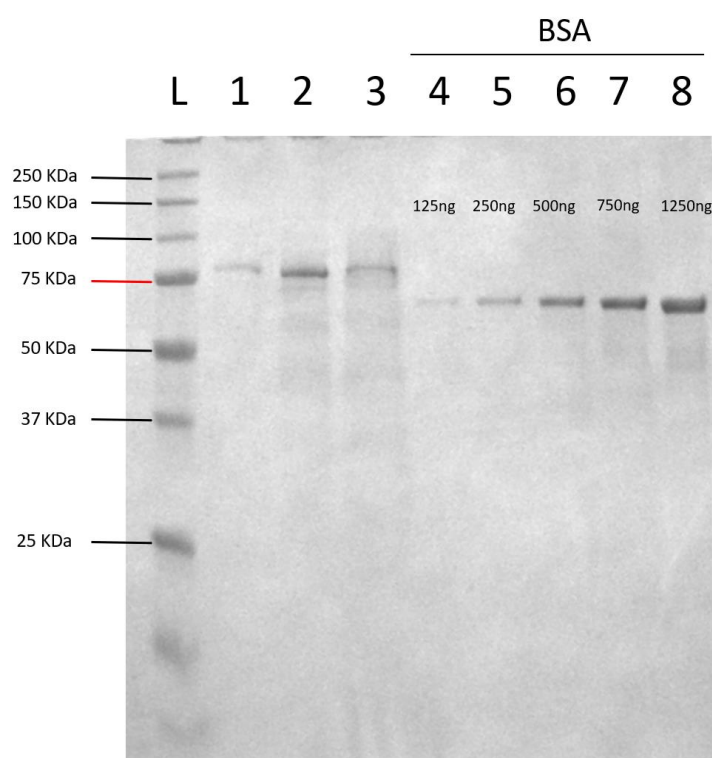

**Figure S9:** SDS-PAGE analysis of purified HDH WT Rsp (1), Phe72Thr (2), and Asn110Val (3) and known Bovine Serum Albumin (BSA) of known concentration ((4) to (8): 0.05, 0.1, 0.2, 0.3, 0.5 mg/mL representing 125, 250, 500, 750 and 1250 ng protein per well, respectively). The relationship between pixel density in the image and the amount of protein in each band was obtained using the software Image J. The protein quantification through interpolation for each purified HDH variant sample was calculated to be 0.091 mg/mL for WT Rsp HDH, 0.226 mg/mL for variant Phe72Thr and 0.178 mg/mL. These values were adjusted by volume in assay and dilution factor for specific activity calculations of the corresponding variant.

## Supporting References

1. Tsutsumi, M., et al., *Thermodynamic redox properties governing the half-reduction characteristics of histamine dehydrogenase from Nocardioides simplex*. Bioscience, biotechnology, and biochemistry, 2008. **72**(3): p. 786-796.
2. Huang, C.-H., et al., *Crystal structure of glucooligosaccharide oxidase from Acremonium strictum: a novel flavinylation of 6-S-cysteinyl, 8 $\alpha$ -N1-histidyl FAD*. Journal of Biological Chemistry, 2005. **280**(46): p. 38831-38838.
3. Stourac, J., et al., *Caver Web 1.0: identification of tunnels and channels in proteins and analysis of ligand transport*. Nucleic acids research, 2019. **47**(W1): p. W414-W422.
4. Ashkenazy, H., et al., *ConSurf 2016: an improved methodology to estimate and visualize evolutionary conservation in macromolecules*. Nucleic acids research, 2016. **44**(W1): p. W344-W350.
5. Lua, R.C., et al., *UET: a database of evolutionarily-predicted functional determinants of protein sequences that cluster as functional sites in protein structures*. Nucleic acids research, 2016. **44**(D1): p. D308-D312.
